# Supplementary material for: Addressing Challenges: Adopting Blockchain Technology in the Pharmaceutical Industry for Enhanced Sustainability
Source: MDPI journal article supplement (doi:10.3390/su16083102), 2024-04-09
Supplement: s1 [file s1]

Archive with 1 entries (1 files):
- sustainability-2824388-supplementary.pdf
